# Supplementary material
Source: PubMed Central journal article supplement (PMC3809780)
Supplement: JCI67603sd.pdf [file JCI67603sd.pdf]

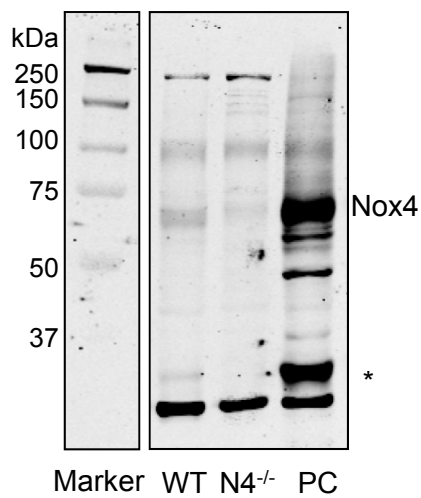

**Supplemental Figure 1:** Western Blot of Nox4 in bones using an antibody kindly provided by A.M. Shah (King's college, London) showing Nox4 and a degradation product of Nox4 (\*). For additional information about specificity of Nox4 detection see Babelova et al. FRBM 2012. WT: wild type mice; N4<sup>-/-</sup>: Nox4 knockout mice; PC: positive control (WT kidney lysate)

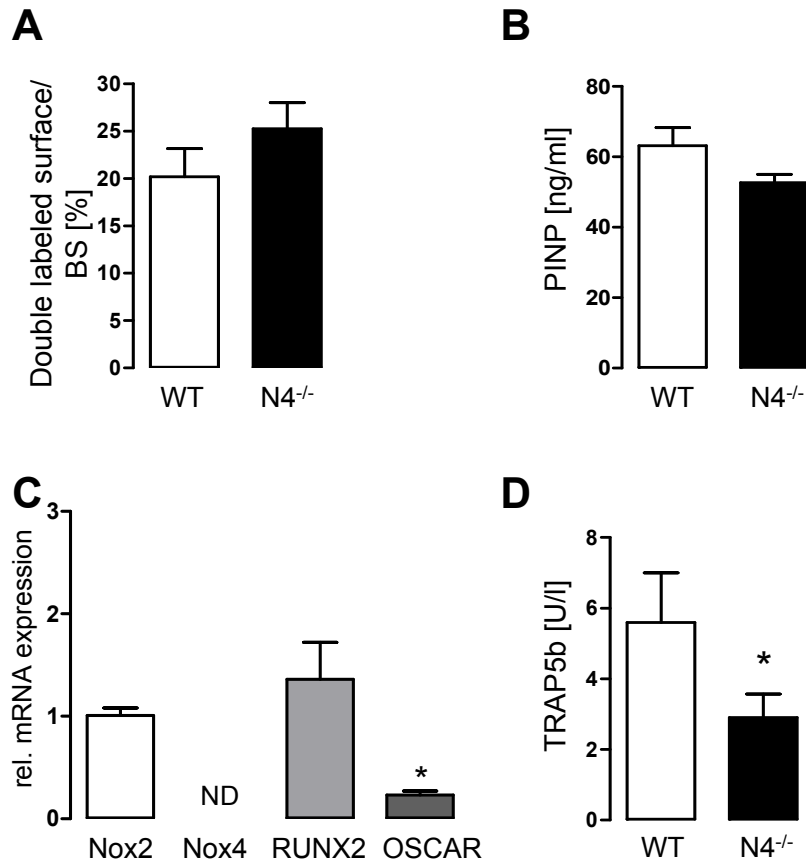

**Supplemental Figure 2:** (A) Bone formation expressed as double labeled surface as determined by bone histomorphometry in bones of WT and Nox4<sup>-/-</sup> mice. (B) Serum levels of bone formation marker P1NP. (C) mRNA expression of Nox2, Nox4, RUNX2 and OSCAR in bones from Nox4<sup>-/-</sup> mice relative to wild type mice. (D) Serum levels of bone resorption marker TRAP5b in WT and Nox4<sup>-/-</sup> mice. WT: wild type mice; N4<sup>-/-</sup>: Nox4 knockout mice; n=5-8; \*p<0.05; data are mean ± SEM

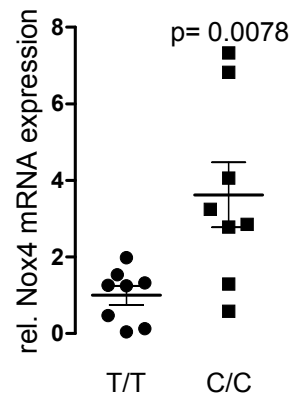

**Supplemental Figure 3:** Nox4 mRNA expression in human B Lymphocytes with (C/C) and without (A/A) the SNP rs11018628 differentiated with vitamin D3 (10 ng/ml) for 3 days . n=8; data are mean  $\pm$  SEM

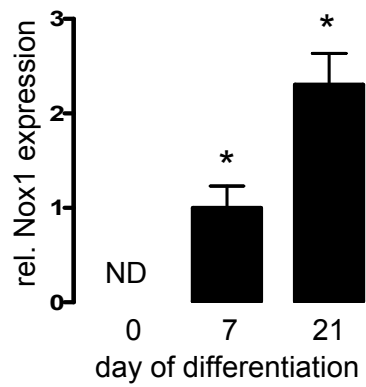

**Supplemental Figure 4:** mRNA expression of Nox1 in the course of differentiation of human precursor cells into osteoclasts. (day 0, Nox1 was not detectable). ND: not detectable; n=5; \*p<0.05; data are mean  $\pm$  SEM

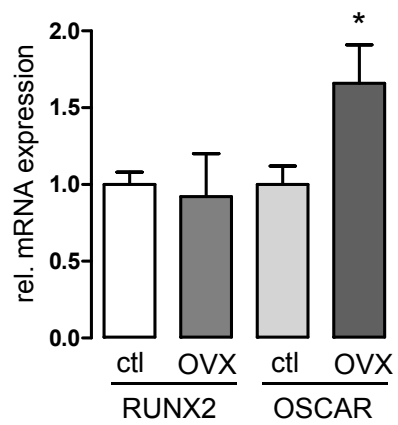

**Supplemental Figure 5:** mRNA expression of RUNX2 and OSCAR in bones of healthy and ovariectomized mice. n=5-8; \*p<0.05; data are mean ± SEM
